# Supplementary material for: Imine-linked micron-network polymers with high polyethylene glycol uptake for shaped-stabilized phase change materials
Source: Royal Society of Chemistry journal article supplement (doi:10.1039/c6ra05283e), 2016-01-01
Supplement: c6ra05283e1.pdf [file c6ra05283e1.pdf]

## Supporting information

# Imine-linked micron-network polymers with high polyethylene glycol uptake for shaped-stabilized phase change materials

**Jia Tang, Shuang Fan, Wenjun Dong, Jingjing Wang, Hongyi Gao, Mu Yang, Ming Yang, and Ge Wang\***

Beijing Key Laboratory of Function Materials for Molecule & Structure Construction, School of Materials Science and Engineering, University of Science and Technology Beijing, Beijing 100083, PR China

\*Corresponding author. Tel.: +86-10-62333765. Email: [gewang@mater.ustb.edu.cn](mailto:gewang@mater.ustb.edu.cn)

## Table of Contents:

**Table S1.** The macroscopic characteristics of network polymers obtained from mercury porosimetry.

**Table S2.** The BET and pore volume tests of the network polymers.

**Table S3.** Phase change enthalpies of PEG-6000@NP-A PCMs composites.

**Table S4.** Phase change enthalpies of the composite PCM and the sample after cycling.

**Table S5.** Phase change enthalpies of PEG-6000@NP-B PCMs composites.

**Fig S1.** Pore size distribution curve of NP-A tested by mercury porosimetry.

**Fig S2.** Pore size distribution curve of NP-B tested by mercury porosimetry.

**Fig S3.** Nitrogen sorption/desorption isotherms and its relative pore size distributions.

**Fig S4.** SEM images of PEG@NP-B composites.

**Fig S5.** The shape-stable effect photos of PEG-6000@NP-B composite PCMs.

**Fig S6.** The PXRD of PEG-6000@NP-B PCMs with various PEG mass fractions.

**Fig S7.** FT-IR spectrum of PEG-6000@NP-B PCMs.

**Fig S8.** The DSC curves of PEG-6000@NP-B PCMs composites with various PEG mass fractions.

**Table S1.** The macroscopic characteristics of network polymers obtained from mercury porosimetry.

|      | Specific Surface Area(m <sup>2</sup> /g) | Specific Pore Volume (m <sup>3</sup> /g) | Porosity (%) |
|------|------------------------------------------|------------------------------------------|--------------|
| NP-A | 17.8                                     | 3.27                                     | 79.7         |
| NP-B | 3.2                                      | 8.69                                     | 89.6         |

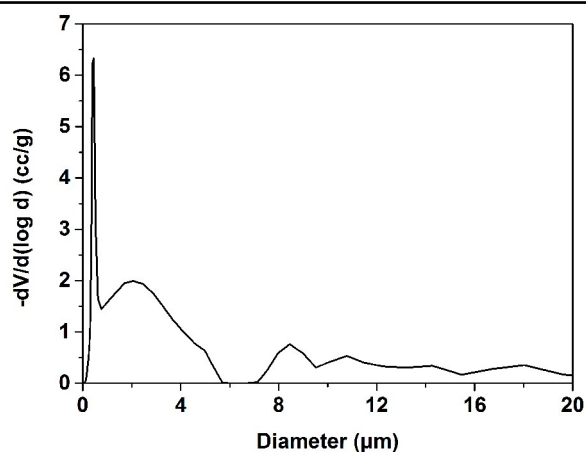

**Fig S1.** Pore size distribution curve of NP-A tested by mercury porosimetry.

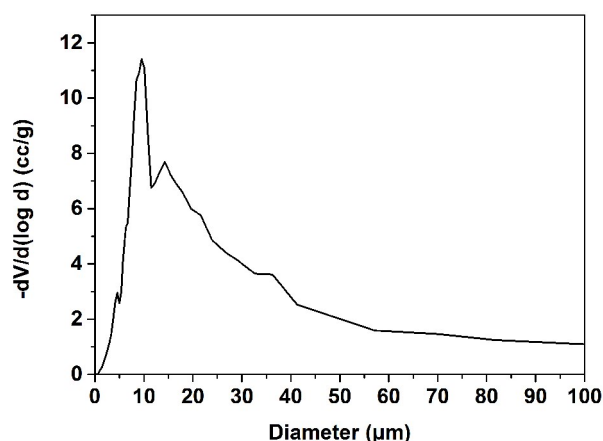

**Fig S2.** Pore size distribution curve of NP-B tested by mercury porosimetry.

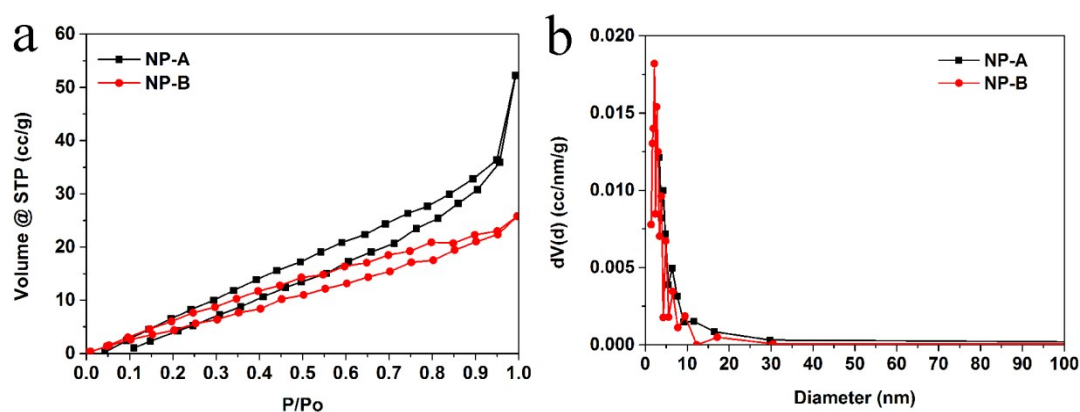

**Fig S3.** (a) Nitrogen sorption/desorption isotherms and (b) pore size distributions of

the two network polymers.

**Table S2.** BET and pore volume tests of the network polymers obtained from nitrogen sorption/desorption analysis.

| Samples | BET (cm <sup>2</sup> /g) | Pore volume (cm <sup>3</sup> /g) |
|---------|--------------------------|----------------------------------|
| NP-A    | 46.3                     | 0.081                            |
| NP-B    | 64.4                     | 0.056                            |

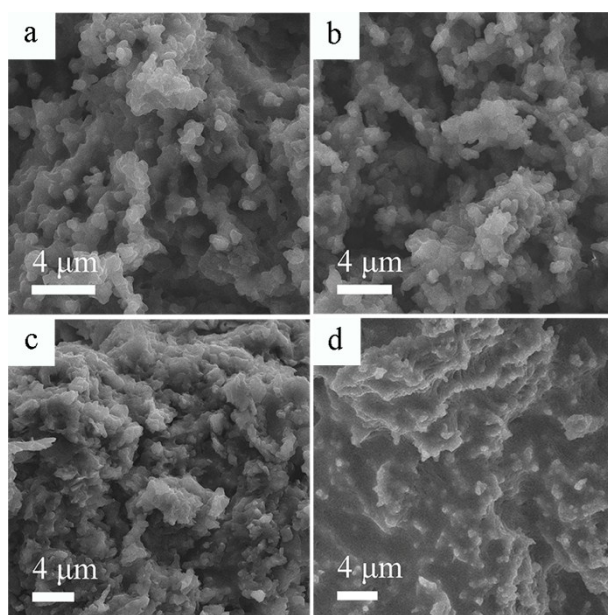

**Fig S4.** SEM images of PEG@NP-B with different mass fraction: (a) 50 wt%, (b) 60 wt%, (c) 70 wt% and (d) 80 wt%.

|                              | 75 wt% PEG                                                                        | 80 wt% PEG                                                                        | 85 wt% PEG                                                                         |
|------------------------------|-----------------------------------------------------------------------------------|-----------------------------------------------------------------------------------|------------------------------------------------------------------------------------|
| 0 mins                       | 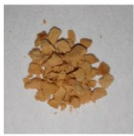 | 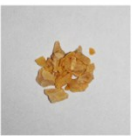 | 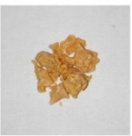 |
| 60 mins                      | 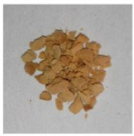 | 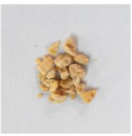 | 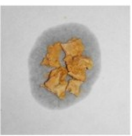 |
| After 50times cycling 0 min  | 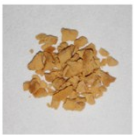 | 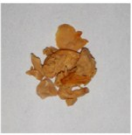 | -                                                                                  |
| After 50times cycling 60 min | 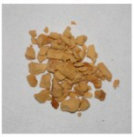 | 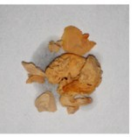 | -                                                                                  |

**Fig S5.** The shape-stable effect photos of PEG-6000@NP-B composite PCMs.

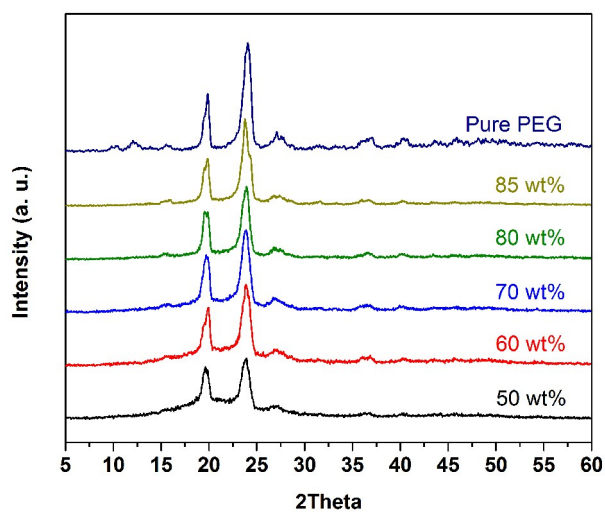

**Fig S6.** XRD patterns of PEG-6000@NP-B PCMs with various PEG mass fractions.

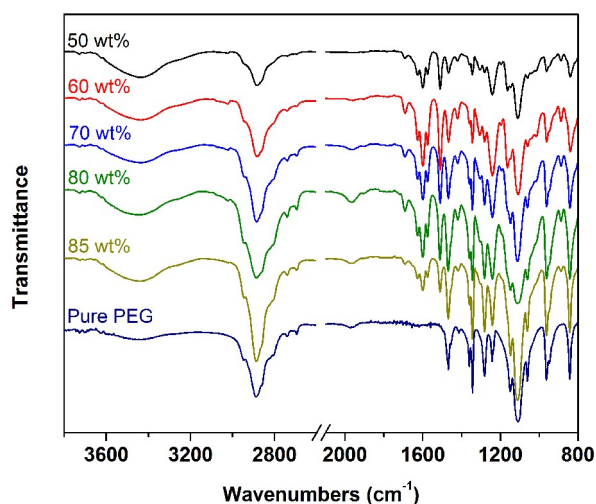

**Fig S7.** FT-IR spectrums of PEG-6000@NP-B PCMs with various PEG mass fractions.

**Table S3.** Phase change enthalpies of PEGs, PEG-6000@NP-A PCMs composites with various PEG mass fractions.

| Samples         | $T_m$ (°C) | $T_c$ (°C) | $\Delta H_m$ (J/g) | $\Delta H_c$ (J/g) |
|-----------------|------------|------------|--------------------|--------------------|
| Pure PEG        | 64.9       | 33.7       | 198.7              | 182                |
| 50 wt% PEG@NP-A | 59.2       | 35.6       | 55.6               | 52                 |
| 60 wt% PEG@NP-A | 60.4       | 34.1       | 106.8              | 99.5               |
| 70 wt% PEG@NP-A | 61.3       | 34.6       | 135.9              | 126.5              |
| 80 wt% PEG@NP-A | 61.3       | 33.6       | 157.9              | 146.3              |
| 85 wt% PEG@NP-A | 61.3       | 33.8       | 164.9              | 152                |

**Table S4.** Phase change enthalpies of the 85 wt%PEG@NP-A composite PCMand its50 times cycling sample.

| Samples          | $T_m$ (°C) | $T_c$ (°C) | $\Delta H_m$ (J/g) | $\Delta H_c$ (J/g) |
|------------------|------------|------------|--------------------|--------------------|
| 85 wt% PEG@NP-A  | 61.3       | 33.8       | 164.9              | 152.0              |
| 50 times cycling | 61.9       | 31         | 146.2              | 129.5              |

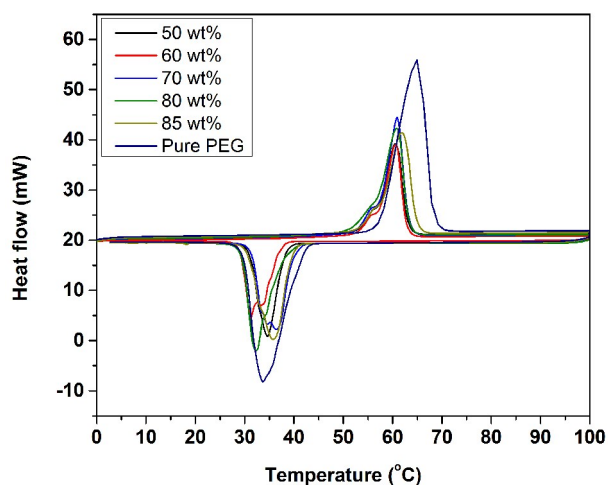

**Fig S8.** The DSC curves of PEG-6000@NP-B PCMs composites with various PEG mass fractions.

**Table S5.** Phase change enthalpies of PEGs, PEG-6000@NP-B PCMs composites with various PEG mass fractions.

| Samples         | $T_m$ (°C) | $T_c$ (°C) | $\Delta H_m$ (J/g) | $\Delta H_c$ (J/g) |
|-----------------|------------|------------|--------------------|--------------------|
| Pure PEG        | 64.9       | 33.7       | 198.7              | 182                |
| 50 wt% PEG@NP-B | 60.5       | 34.7       | 103.4              | 97.2               |
| 60 wt% PEG@NP-B | 60.6       | 31.3       | 122.8              | 111.3              |
| 70 wt% PEG@NP-B | 60.9       | 36.5       | 146                | 133.6              |
| 80 wt% PEG@NP-B | 60.9       | 32.4       | 149.2              | 135.1              |
| 85 wt% PEG@NP-B | 61.9       | 35.7       | 155.5              | 143.8              |
